# Supplementary material for: Molecular analysis of flies selected for aggressive behavior
Source: Springer Nature journal article supplement (doi:10.1038/ng1864), 2006-08-13
Supplement: ng1864-S3.pdf [file ng1864-S3.pdf]

Supplementary Table 1: Biological categories of significant genes<sup>32</sup> ( $P < 0.002$ ).

List of all genes that are significantly differentially expressed between Aggr and Neutr lines at Gen21 at a significance level of 0.002 arranged by biological function.

Also included are: gene symbol and common name, fold up / down expression in Aggr lines and molecular function (if known). Some genes occur several times in this table..

| <b>Biological process</b>  | <b>Symbol</b> | <b>Common</b>                           | <b>Fold up in Aggr</b> | <b>Fold down in Aggr</b> | <b>Molecular function or domain</b>                       |
|----------------------------|---------------|-----------------------------------------|------------------------|--------------------------|-----------------------------------------------------------|
| immune response            | Drs           | Drosomycin                              | 2.08                   |                          | ion channel inhibitor bacterial response                  |
|                            | GNBP1         | Gram-negative bacteria binding protein1 |                        | 1.62                     | concanavilin A-like lectin, glycoside hydrolase           |
| cuticle proteins           | CG4784        |                                         | 1.20                   |                          | structural constituent of insect cuticle                  |
|                            | CG2555        |                                         |                        | 1.47                     | structural constituent of larval cuticle                  |
|                            | CG9295        |                                         | 1.38                   |                          | structural constituent of insect cuticle                  |
|                            | Chit          | Chitinase-like                          | 1.17                   |                          | glycoside hydrolase family18ChitinaseII                   |
| Calcium mediated signaling | CG31475       |                                         | 1.42                   |                          | Calcium-binding EF-hand                                   |
|                            | Cam           | Calmodulin                              | 1.16                   |                          | Calcium ion sensing                                       |
|                            | trpl          | trp-like                                | 1.12                   |                          | cation (not K+) channel activity                          |
|                            | TpnC41C       | Troponin C at 41C                       | 1.43                   |                          | calmodulin binding                                        |
| muscle contraction         | Mlc1          | Myosin alkali light chain 1             | 1.37                   |                          | peptidase, calcium-binding EF-hand                        |
|                            | TpnC41C       | Troponin C at 41C                       | 1.43                   |                          | Calcium-binding EF-hand                                   |
|                            | Cam           | Calmodulin                              | 1.16                   |                          | Calcium sensing                                           |
| cytoskeletal               | CG10131       |                                         | 1.25                   |                          | oxidoreductase cytoskeletal activity                      |
|                            | CAP           | Vinexin                                 | 1.20                   |                          | vinculin binding, structural constituent of cytoskeleton, |

|                         |          |                                |      |      |                                                                            |
|-------------------------|----------|--------------------------------|------|------|----------------------------------------------------------------------------|
|                         |          |                                |      |      | SH3, Sorbin-like                                                           |
| apoptosis               | CG5333   |                                | 1.27 |      | programmed cell death protein2                                             |
|                         | mub      | mushroom-body expressed        |      | 1.29 | K Homology domain type1, nucleic acid binding proteins                     |
|                         | CG1216   |                                | 1.19 |      |                                                                            |
| channels & transporters | CG17646  |                                |      |      | ABC transporter, ATP-ase activity                                          |
|                         | CG1216   |                                | 1.19 |      | voltage gated K channel                                                    |
|                         | CG10444  |                                |      | 1.55 | Na dependent multivitamin transporter                                      |
|                         | CG3397   |                                | 2.10 |      | voltage gated K channel complex                                            |
| neuronal function       | SNAP     | soluble NSF attachment protein | 1.44 |      | NSF attachment protein                                                     |
|                         | CG5195   |                                | 1.48 |      | DNA binding                                                                |
|                         | mfas     |                                | 1.31 |      | axogenesis                                                                 |
|                         | Dh       | Diuretic hormone               |      | 1.63 | corticotropin releasing factor (neuropeptide signaling)                    |
| pheromone signaling     | Obp56a   | Odor-binding protein 56a       |      | 2.50 | odor binding protein                                                       |
|                         | Cyp6a20  | Cytochrome P450 6a20           |      | 1.46 | cytochrome P450 E-class                                                    |
| circadian rhythm        | vri      | vrille                         |      | 1.24 | basic-leucine zipper transcription factor                                  |
| transcription           | Pif1     | PFTAIRE-interacting factor 1A  |      | 1.24 | basic-leucine zipper transcription factor                                  |
|                         | CG32529  |                                |      |      | DNA binding, Bromo adjacent domain                                         |
|                         | gce      | germ-cell expressed bHLH PAS   |      |      | bHLH-PAS                                                                   |
|                         | CG5195   |                                | 1.48 |      | DNA binding                                                                |
|                         | CG17921  | HMG protein Z                  | 1.24 |      | HMG1/2 box                                                                 |
|                         | mub      | mushroom-body expressed        |      | 1.29 | KH domain                                                                  |
|                         | vri      | vrille                         |      | 1.24 | Basic-leucine zipper transcription factor                                  |
| signaling               | CG8942   |                                |      | 1.34 | Wnt protein binding, structural molecule activity, sugar binding           |
|                         | Gbeta76C | G-protein beta subunit 76C     | 1.14 |      | G-protein beta subunit                                                     |
|                         | CAP      | Vinexin                        | 1.20 |      | vinculin binding, structural constituent of cytoskeleton, SH3, Sorbin-like |
|                         | Lk6      |                                |      | 1.23 | serine/threonine protein kinase                                            |
|                         | kek4     | kekcon 4                       |      | 1.39 | Leucine rich repeat                                                        |
|                         | mub      | mushroom-body expressed        |      | 1.29 | KH domain                                                                  |

|                              |           |                             |      |      |                                                                  |
|------------------------------|-----------|-----------------------------|------|------|------------------------------------------------------------------|
| chaperone                    | CG4461    |                             | 1.20 |      | HSP20-like chaperone                                             |
| proteolysis                  | DppIII    |                             |      | 1.13 | dipeptidase                                                      |
|                              | Mlc1      | Myosin alkali light chain 1 | 1.37 |      | peptidase, calcium-binding EF-hand                               |
| protein phosphorylation      | CG7378    |                             | 1.35 |      | dual specificity protein phosphatase                             |
| nitrogen compound metabolism | CG9836    |                             |      | 1.19 | nitrogen-fixing NifU-like                                        |
|                              | CG7900    |                             | 1.54 |      | fatty acid hydrolase                                             |
| aa metabolism                | CG4802    |                             | 1.16 |      | purine phosphorylase family 2                                    |
|                              | CG11899   |                             | 1.61 |      | aminotransferase class V, phosphoserine aminotransferase         |
| sugar metab.                 | CG6910    |                             | 1.14 |      | oxidoreductase                                                   |
|                              | CG7997    |                             |      | 1.12 | glycoside hydrolase family 27, alpha galactosidase               |
|                              | CG3752    |                             | 1.23 |      | aldehyde dehydrogenase (NAD) activity                            |
|                              | CG5955    |                             | 1.47 |      | UDP glucose-4 epimerase                                          |
|                              | CG32444   |                             | 1.53 |      | aldose-1 epimerase activity                                      |
|                              | Treh      | Trahalase                   | 1.35 |      | glycoside hydrolase family 37                                    |
|                              | Tal       | Transaldolase               | 1.44 |      | transaldolase                                                    |
| lipid metabolism             | CG4825    |                             |      | 1.66 | phosphatidyl serine synthase                                     |
|                              | wun       | wunen                       | 1.12 |      | phosphoesterase                                                  |
|                              | CG10131   |                             | 1.25 |      | oxidoreductase cytoskeletal activity                             |
| unknown                      | CG7529    |                             |      | 1.36 | carboxyl esterase activity                                       |
|                              | alphaEst1 | alpha-Esterase-1            | 1.34 |      | carboxyl esterase activity                                       |
|                              | alphaEst8 | alpha-Esterase-8            | 1.53 |      | carboxyl esterase activity                                       |
|                              | CG10527   |                             | 1.18 |      | farnesoic acid O-methyl transferase activity                     |
|                              | CG32062   |                             |      | 1.13 | RNA binding                                                      |
|                              | CG13252   |                             |      | 1.49 | protease inhibitor, Von Willebrand factor typeC                  |
|                              | CG17533   | Gutathion S-transferase E8  | 1.22 |      | glutathion S-transferase                                         |
|                              | CG2767    |                             | 1.33 |      | alcohol dehydrogenase NADP+ activity, aldo/keto reductase domain |
| unknown                      | CG18162   |                             | 1.48 |      | Unknown                                                          |
|                              | CG15201   |                             | 1.17 |      | Unknown                                                          |
|                              | CG31145   |                             |      |      | Unknown                                                          |
|                              | CG3955    |                             | 1.23 |      | Unknown                                                          |
|                              | CG10098   |                             |      | 1.35 | unknown                                                          |
|                              | CG1648    |                             | 1.15 |      | unknown                                                          |
|                              | CG4962    |                             | 1.19 |      | unknown                                                          |
|                              | CG5104    |                             | 1.38 |      | Unknown                                                          |
|                              | CG15449   |                             | 1.35 |      | Unknown                                                          |

|  |         |  |      |      |         |
|--|---------|--|------|------|---------|
|  | CG1943  |  | 1.36 |      | Unknown |
|  | CG30492 |  | 1.09 |      | Unknown |
|  | CG7331  |  | 1.33 |      | Unknown |
|  | CG6852  |  | 1.36 |      | Unknown |
|  | CG18606 |  | 1.15 |      | unknown |
|  | CG11073 |  | 1.41 |      | Unknown |
|  | CG11458 |  |      | 1.98 | Unknown |
|  | CG16978 |  | 2.55 |      | Unknown |
|  | CG5498  |  | 1.36 |      | unknown |
